# Supplementary material
Source: publisher figshare collection journal article supplement (https://tandf.figshare.com/ndownloader/files/14133773)
Supplement: Supplementary file 1 [file 14133773]

Table s1. Study quality on the AHRQ scale

| First author/publication year                                                                                                       | Sogol<br>Javaheri<br>2008 | Xiaofan<br>Guo<br>2011 | Ines<br>Paciencia<br>2013 | Leila<br>Azadbakht<br>2013 | J.A.<br>Lee<br>2014 | Renata<br>Kuciene<br>2014 | Cengizz<br>Ball<br>2017 |
|-------------------------------------------------------------------------------------------------------------------------------------|---------------------------|------------------------|---------------------------|----------------------------|---------------------|---------------------------|-------------------------|
| Items                                                                                                                               |                           |                        |                           |                            |                     |                           |                         |
| 1) Define the source of information (survey, record review)                                                                         | yes                       | yes                    | yes                       | yes                        | yes                 | yes                       | yes                     |
| 2) List inclusion and exclusion criteria for exposed and unexposed subjects (cases and controls) or refer to previous publications  | yes                       | yes                    | yes                       | yes                        | yes                 | yes                       | no                      |
| 3) Indicate time period used for identifying patients                                                                               | yes                       | yes                    | yes                       | yes                        | yes                 | yes                       | yes                     |
| 4) Indicate whether or not subjects were consecutive if not population-based                                                        | yes                       | yes                    | yes                       | yes                        | yes                 | yes                       | yes                     |
| 5) Indicate if evaluators of subjective components of study were masked to other aspects of the status of the participants          | yes                       | no                     | yes                       | yes                        | yes                 | yes                       | yes                     |
| 6) Describe any assessments undertaken for quality assurance purposes (e.g., test/retest of primary outcome measurements)           | yes                       | no                     | no                        | no                         | no                  | yes                       | no                      |
| 7) Explain any patient exclusions from analysis                                                                                     | no                        | yes                    | yes                       | no                         | yes                 | yes                       | no                      |
| 8) Describe how confounding was assessed and/or controlled                                                                          | yes                       | yes                    | yes                       | yes                        | yes                 | yes                       | yes                     |
| 9) If applicable, explain how missing data were handled in the analysis                                                             | no                        | no                     | no                        | no                         | no                  | no                        | no                      |
| 10) Summarize patient response rates and completeness of data collection                                                            | no                        | yes                    | yes                       | no                         | yes                 | yes                       | no                      |
| 11) Clarify what follow-up, if any, was expected and the percentage of patients for which incomplete data or follow-up was obtained | no                        | no                     | no                        | no                         | no                  | no                        | no                      |

Table s2. Sensitivity analysis about the association between short sleep duration and high blood pressure. (a) and (b) indicate boys and girls, respectively.

| Study omitted             | Odds Ratio | [95% Confidence Interval] |
|---------------------------|------------|---------------------------|
| Sogol Javaheri2008        | 1.4467057  | .97815931 2.1396897       |
| XiaofanGuo(boysa)2011     | 1.5044129  | .97012424 2.332957        |
| Xiaofan Guo(boysb)2011    | 1.581327   | 1.0673059 2.3429039       |
| Xiaofan Guo(girlsa)2011   | 1.5812936  | 1.0500308 2.3813486       |
| Xiaofan Guo(girlsb)2011   | 1.7420336  | 1.2597389 2.4089761       |
| J.A. Lee2014              | 1.437888   | .95093542 2.1741979       |
| Renata Kuciene(boys)2014  | 1.4691416  | .92869687 2.3240921       |
| Renata Kuciene(girls)2014 | 1.3421607  | .98130429 1.8357153       |
| Combined                  | 1.5119205  | 1.0446493 2.1882018       |

Table s3. Sensitivity analysis about the association between long sleep duration and high blood pressure. (a) and (b) indicate boys and girls, respectively.

| Study omitted              | Odds Ratio | [95% Confidence Interval] |
|----------------------------|------------|---------------------------|
| XiaofanGuo(boysa)2011      | .99595875  | .7281462 1.3622729        |
| Xiaofan Guo(boysb)2011     | 1.0236456  | .75526989 1.3873852       |
| Xiaofan Guo(girlsa)2011    | 1.0499718  | .75965387 1.4512409       |
| Xiaofan Guo(girlsb)2011    | 1.0793253  | .80393761 1.4490465       |
| Ines Paciencia(boys)2013   | 1.0580162  | .76712382 1.4592147       |
| Ines Paciencia(girls)2013  | .95870984  | .733253 1.253489          |
| Leila Azadbakht(boys)2013  | 1.035957   | .76973009 1.3942637       |
| Leila Azadbakht(girls)2013 | 1.0253489  | .76289159 1.3780992       |
| J.A. Lee2014               | .98731345  | .73523104 1.3258252       |
| Cengizz Ball(boys)2017     | 1.1128098  | .83996975 1.4742742       |
| Cengizz Ball(girls)2017    | 1.1309975  | .87091386 1.4687506       |
| Combined                   | 1.0410956  | .78459363 1.3814541       |

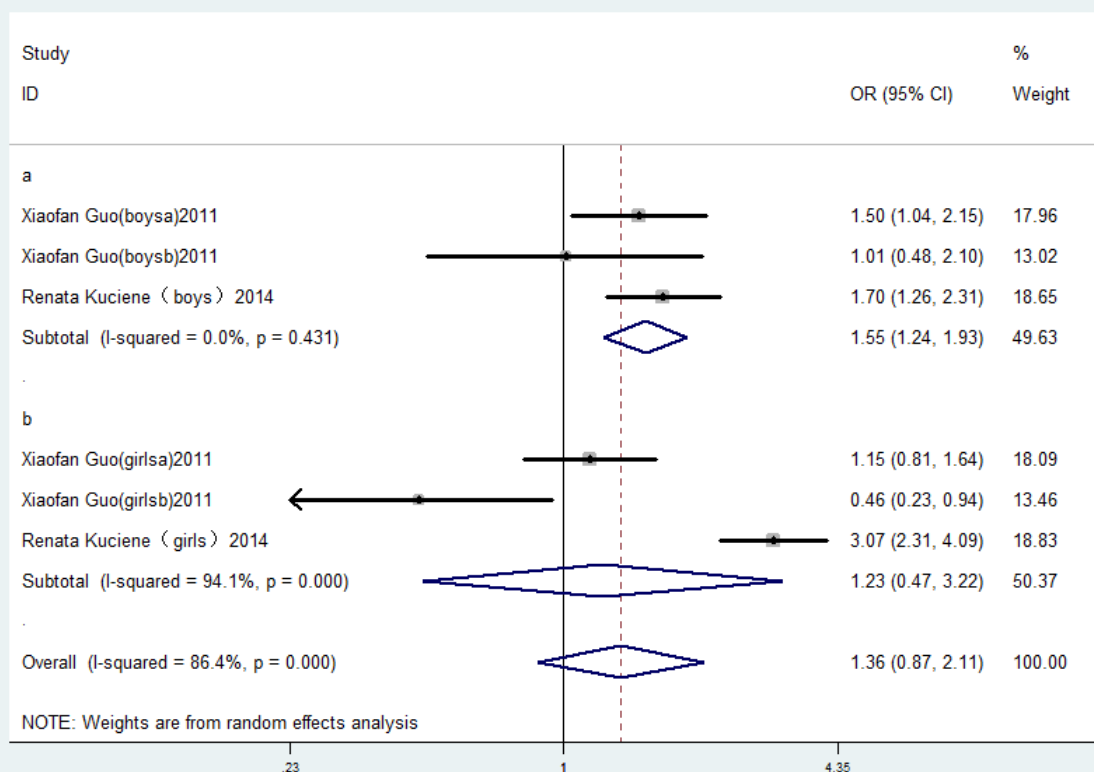

Figure s1. Forest plot of association between short sleep duration and high blood pressure; OR, odds ratio; 95% CI, 95% confidence intervals. (a) and (b) indicate boys and girls, respectively.

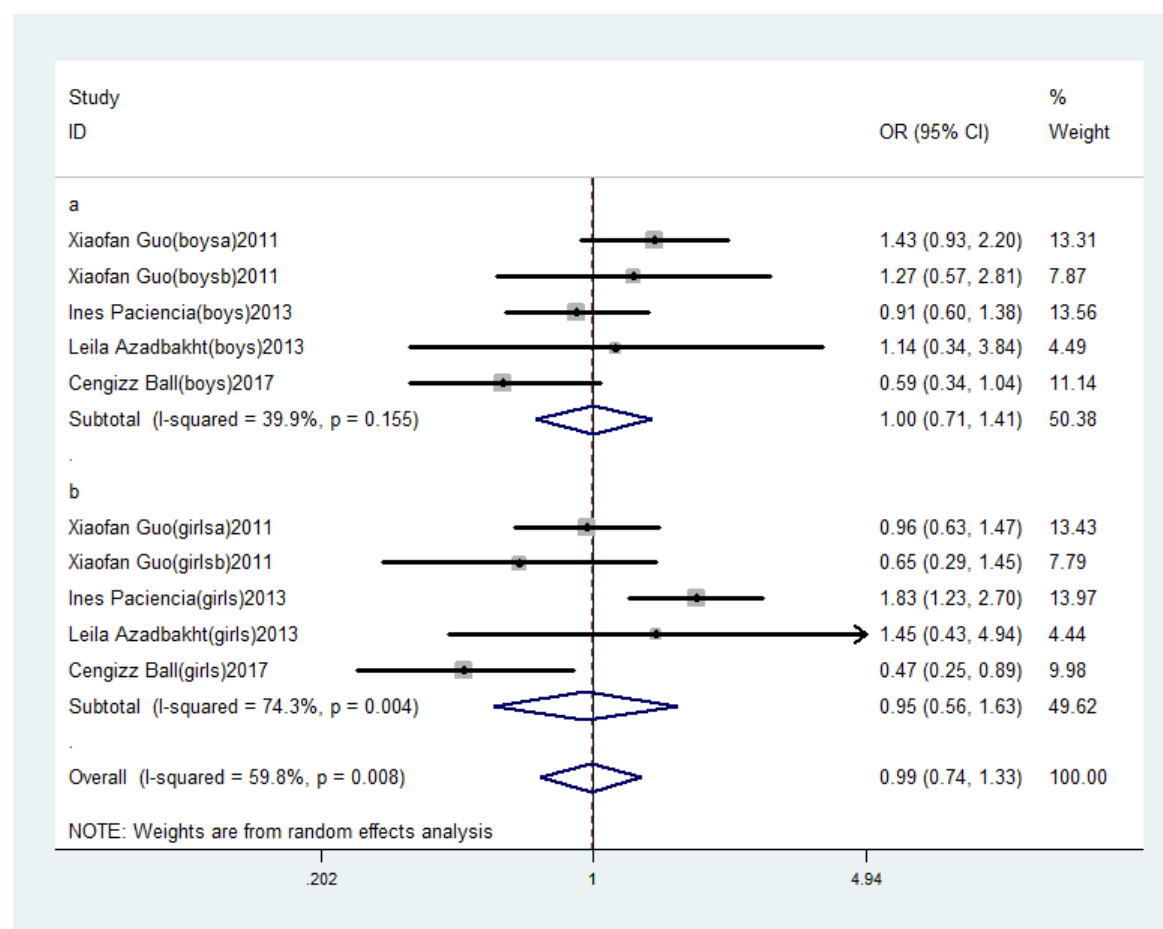

Figure s2.— Forest plot of association between long sleep duration and high blood pressure; OR, odds ratio; 95% CI, 95% confidence intervals. (a) and (b) indicate boys and girls, respectively.
